# Supplementary material for: Spatiotemporal Distribution of Precipitation over the Mongolian Plateau during 1976–2017
Source: MDPI journal article supplement (doi:10.3390/atmos13122132), 2022-12-19
Supplement: s1 [file s1]

# Spatiotemporal Distribution of Precipitation over the Mongolian Plateau during 1976–2017

Yingying Xia <sup>1,2,3\*</sup>, Dan Dan <sup>1,2,3</sup>, Hongyu Liu <sup>1,2,3</sup>, Haijun Zhou <sup>1,2,3</sup> and Zhiqiang Wan <sup>1,2,3</sup>

**Table S1** Altitude statistics of Mongolian Plateau stations

| Elevation/m | <500 | 500-1000 | 1000-1500 | 1500-2000 |
|-------------|------|----------|-----------|-----------|
| Stations    | 3    | 7        | 121       | 4         |
| Proportion  | 2%   | 5%       | 90%       | 3%        |

**Table S2** The forecasted annual average precipitation using different interpolation methods during 1976-2017

| Station                     | Measured value | Predictive value |         |
|-----------------------------|----------------|------------------|---------|
|                             |                | IDW              | Kriging |
| Bayankhongor                | 195.17         | 217.55           | 212.2   |
| Buyante                     | 92.51          | 140.03           | 141.64  |
| Dalanzadgad                 | 128.33         | 110.11           | 109.14  |
| Zamyn-Uud                   | 136.87         | 136.12           | 152.21  |
| Altai                       | 179.46         | 191.81           | 165.96  |
| Qiaoyier                    | 174.41         | 164.36           | 140.48  |
| Baruunturuun                | 225.09         | 177.55           | 163.43  |
| Ulaangom                    | 142.99         | 133.53           | 143.01  |
| Bulgan                      | 328.45         | 293.42           | 275.42  |
| Olgii                       | 120.40         | 130.49           | 128.19  |
| Zhu Rihe                    | 202.69         | 277.21           | 270.51  |
| Huade                       | 318.61         | 319.26           | 328.47  |
| Linxi County                | 366.32         | 342.9            | 343     |
| Kailu County                | 326.15         | 351.48           | 377.24  |
| New Chen Balhu Left Banner  | 279.02         | 306.58           | 319.88  |
| New Chen Balhu Right Banner | 237.48         | 285.37           | 274.72  |
| Baotou                      | 305.79         | 316.77           | 298.78  |
| Hohhot                      | 405.08         | 396.13           | 359.83  |
| East Ujimqin Banner         | 250.45         | 285.06           | 290.96  |
| West Ujimqin Banner         | 328.13         | 335.09           | 324.26  |

**Table S3** The interpolation analysis of the mean annual precipitation during 1976-2017

| Test indicators | Interpolation method |         |
|-----------------|----------------------|---------|
|                 | IDW                  | Kriging |
| MAE             | 23.71                | 29.87   |
| RMSE            | 30.02                | 36.04   |

**Table S4** Annual precipitation in different stages and its correlation with EASMI and WI

| Stage                                       | 1976-1982 | 1983-1998 | 1999-2010 | 2011-2017 |
|---------------------------------------------|-----------|-----------|-----------|-----------|
| Annual average precipitation/mm             | 230.6     | 255.1     | 212.6     | 258.4     |
| Correlation between precipitation and EASMI | 0.42      | 0.46      | 0.31      | 0.69      |
| Correlation between precipitation and WI    | -0.09     | -0.28     | -0.22     | -0.52     |

**Table S5** Precipitation change rate at 135 stations during 1976-2017 in the Mongolian Plateau

| Season | Significant increase<br>( $P < 0.05$ ) |            | Not significant<br>increase ( $P > 0.05$ ) |            | Stable ( $P > 0.05$ ) |            | Not significant<br>decrease ( $P > 0.05$ ) |            | Significant decrease<br>( $P < 0.05$ ) |            |
|--------|----------------------------------------|------------|--------------------------------------------|------------|-----------------------|------------|--------------------------------------------|------------|----------------------------------------|------------|
|        | Stations                               | Percentage | Stations                                   | Percentage | Stations              | Percentage | Stations                                   | Percentage | Stations                               | Percentage |
| Annual | 6                                      | 4%         | 34                                         | 25%        | 55                    | 41%        | 37                                         | 28%        | 3                                      | 2%         |
| Spring | 23                                     | 17%        | 63                                         | 47%        | 42                    | 31%        | 5                                          | 4%         | 2                                      | 1%         |
| Summer | 4                                      | 3%         | 14                                         | 10%        | 45                    | 33%        | 63                                         | 47%        | 9                                      | 7%         |
| Autumn | 25                                     | 19%        | 48                                         | 36%        | 53                    | 38%        | 9                                          | 7%         | 0                                      | 0          |
| Winter | 31                                     | 23%        | 45                                         | 33%        | 41                    | 31%        | 14                                         | 10%        | 4                                      | 3%         |

**Table S6** Precipitation change rate at 135 stations during 1976-2017 in the Mongolian Plateau

| Arid types       | Precipitation /mm | Significant increase<br>( $P < 0.05$ ) |            | Not significant increase<br>( $P > 0.05$ ) |            | Stable ( $P > 0.05$ ) |            | Not significant decrease<br>( $P > 0.05$ ) |            | Significant decrease<br>( $P < 0.05$ ) |            |
|------------------|-------------------|----------------------------------------|------------|--------------------------------------------|------------|-----------------------|------------|--------------------------------------------|------------|----------------------------------------|------------|
|                  |                   | Stations                               | Percentage | Stations                                   | Percentage | Stations              | Percentage | Stations                                   | Percentage | Stations                               | Percentage |
| Semi-wet area    | 400-600           | 0                                      | 0          | 1                                          | 0.7%       | 5                     | 3.4%       | 5                                          | 4%         | 0                                      | 0          |
| Semi-dry area    | 200-400           | 0                                      | 0          | 13                                         | 10%        | 28                    | 20.8%      | 26                                         | 19.2%      | 3                                      | 2.1%       |
| Dry area         | 100-200           | 4                                      | 3%         | 16                                         | 11.8%      | 21                    | 16%        | 6                                          | 4%         | 0                                      | 0          |
| Extreme dry area | <100              | 2                                      | 1.4%       | 4                                          | 3%         | 1                     | 0.7%       | 0                                          | 0          | 0                                      | 0          |

**Table S7.** Analysis of Partial between precipitation and atmospheric circulation factors during 1976–2017 in the Mongolian Plateau.

| Precipitation | ENSO  | EASMI  | NAO    | AO    | PDO    | SO     | SH      | WI     |
|---------------|-------|--------|--------|-------|--------|--------|---------|--------|
| Annual        | 0.06  | 0.45** | -0.36* | 0.22  | -0.07  | -0.22  | 0.07    | -0.32* |
| Spring        | 0.38* | 0.27   | 0.01   | 0.02  | -0.14  | 0.26   | 0.13    | -0.24  |
| Summer        | -0.15 | 0.40** | -0.31  | 0.28  | 0.05   | -0.34* | -0.02   | 0.12   |
| Autumn        | 0.15  | 0.11   | -0.24  | -0.12 | -0.21  | -0.04  | 0.13    | -0.05  |
| Winter        | 0.21  | -0.31  | -0.03  | -0.14 | -0.32* | 0.10   | -0.44** | 0.01   |

\*\* . Correlation at 0.01; \* . Correlation at 0.05

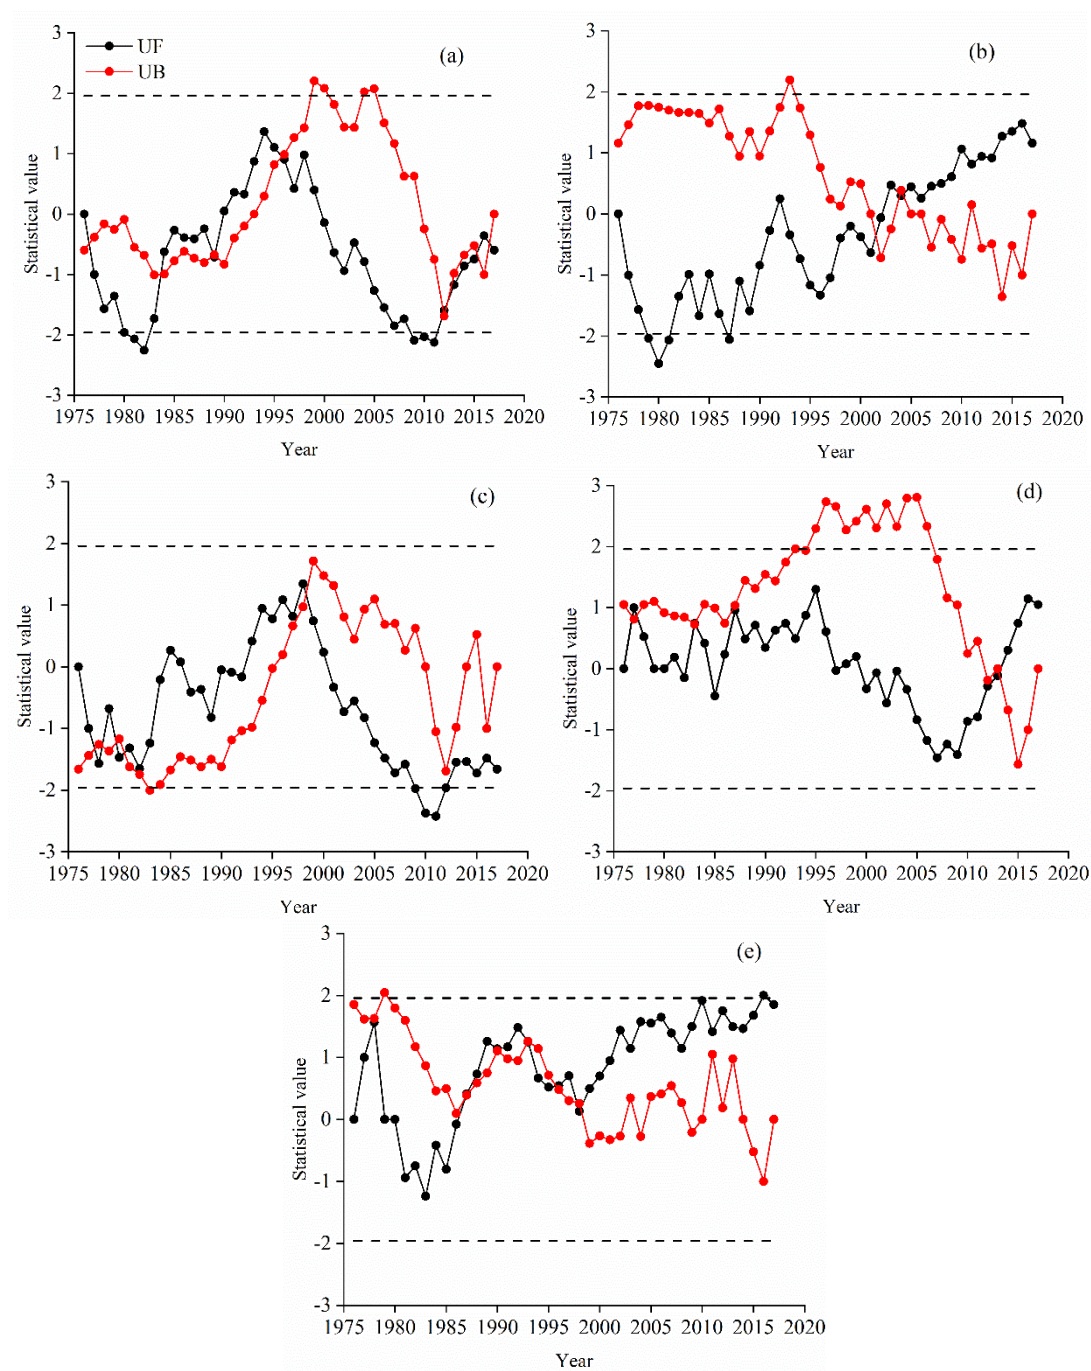

**Figure S1.** MK test of precipitation in Mongolian Plateau during 1976 to 2017 ((a) Annual, (b) Spring, (c) Summer, (d) Autumn, (e) Winter).

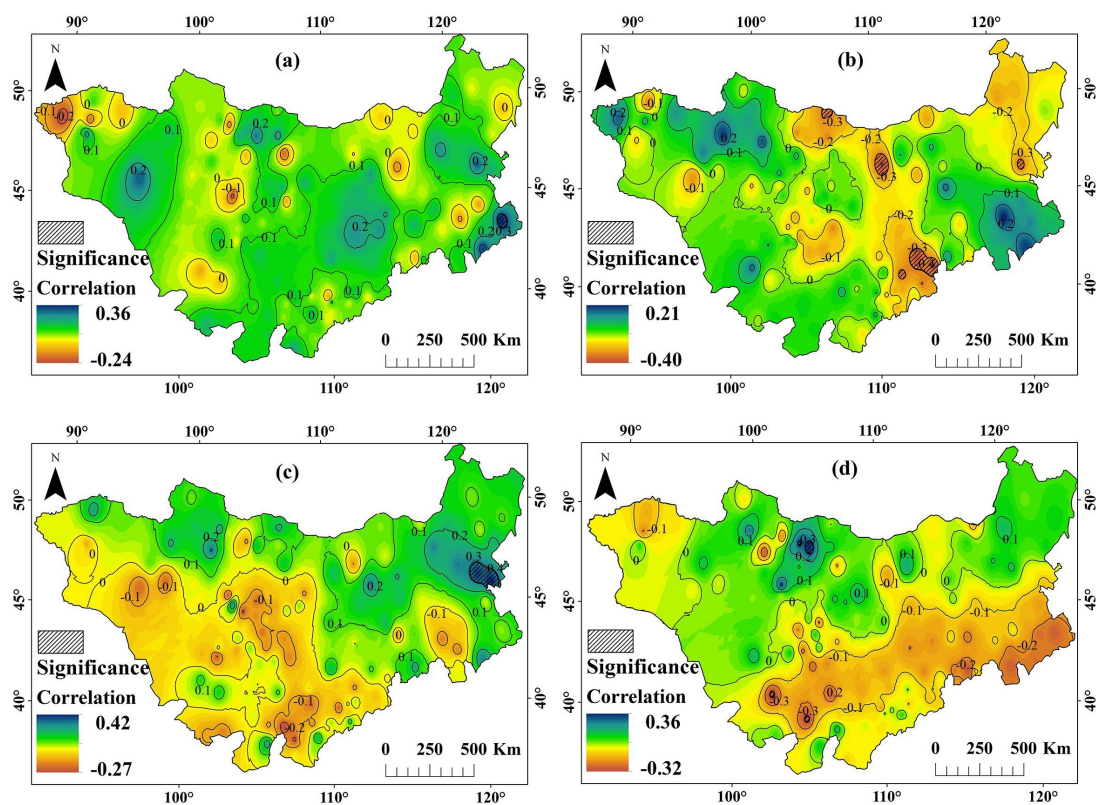

**Figure S2.** The spatial distribution of the correlation between precipitation and East Asian Summer Monsoon Index ((a) Spring, (c) Autumn), the correlation between precipitation and Westerly Index ((b) Spring, (d) Autumn) (Shaded indicates  $P < 0.05$ ).

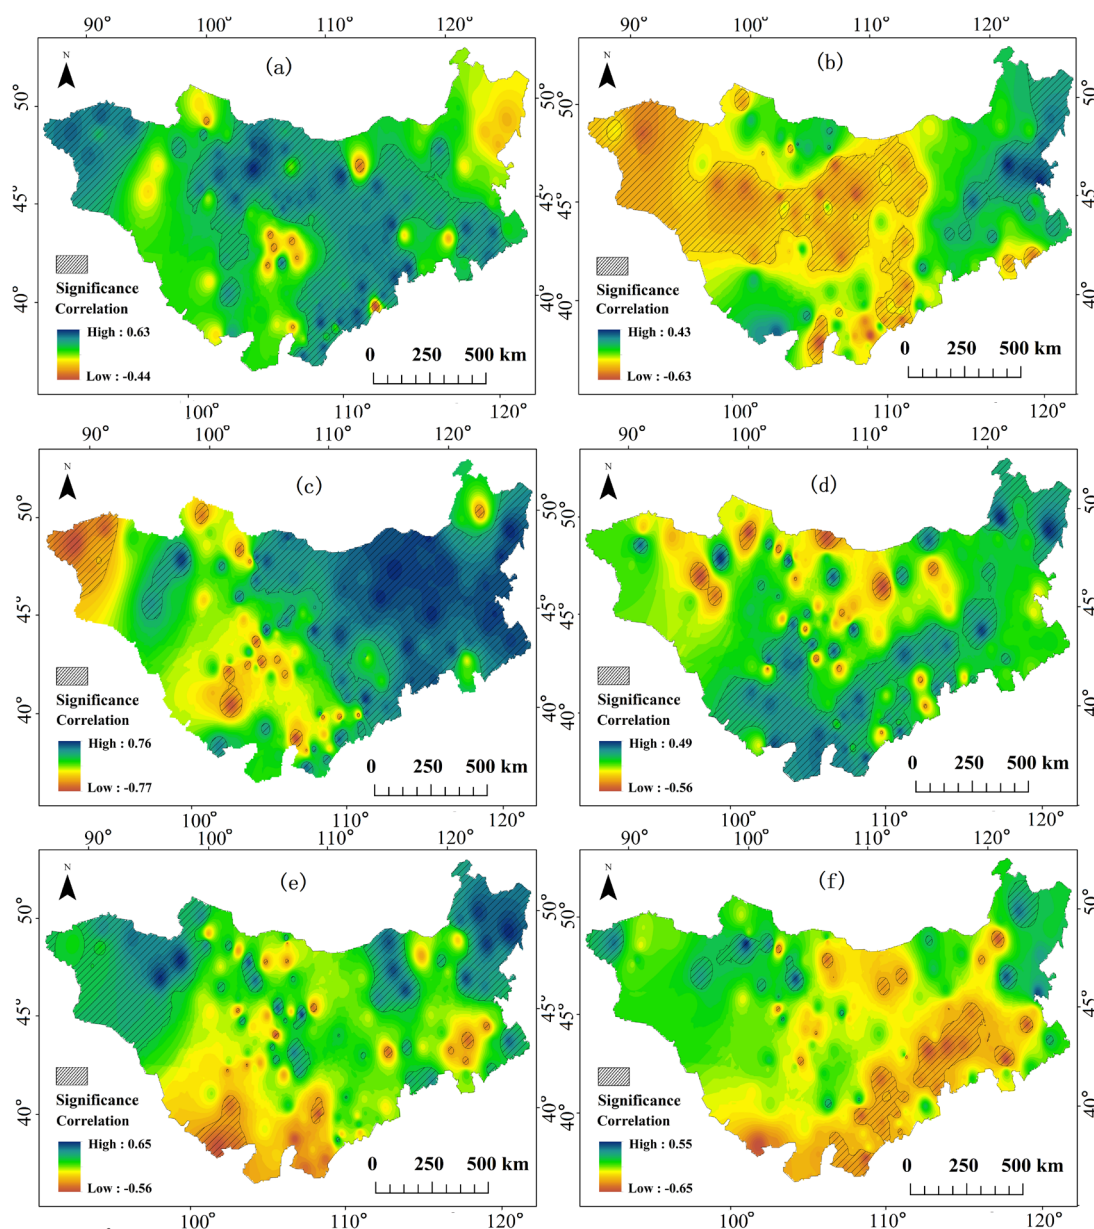

**Figure S3.** The spatial distribution of the correlation between precipitation and East Asian Summer Monsoon Index ((a) 2015, (c) 1998, (e) 2005), the correlation between precipitation and Westerly Index ((b) 2015, (d) 1998, (f) 2005) (Shaded indicates  $P < 0.05$ ).
